# Calling All Unusual Events: AQI Seeks Case Reports

Richard P. Dutton, M.D., M.B.A., Executive Director  
*Anesthesia Quality Institute*

The **Anesthesia Quality Institute** invites all ASA members to submit brief reports of unusual events, adverse outcomes or close calls to the Anesthesia Incident Reporting System. Reports to AIRS may be confidential or anonymous, and are protected from legal discovery by the Patient Safety and Quality Improvement Act of 2005. ASA and AQI are especially seeking cases in the following categories of national importance:

- Patient harm related to shortage or unavailability of an indicated medication.
- Postoperative respiratory depression occurring after discharge from the PACU.

Please make your report to AIRS at [www.aqiairs.org](http://www.aqiairs.org), and thank you for improving the safety of anesthesia.

Anesthesia  
Quality Institute 

**ANESTHESIA INCIDENT  
REPORTING SYSTEM (AIRS)**

See the latest  
AIRS case report  
on page 44.

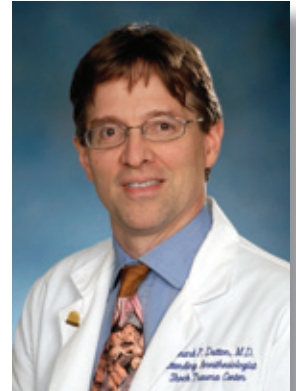

*Richard P. Dutton, M.D., M.B.A. is a  
Clinical Associate Anesthesiologist  
at the University of Chicago.*

Downloaded from <http://esa2.silverchair.com/monitor/article-pdf/1438219/55.pdf> by guest on 20 April 2024

American Society of  
Anesthesiologists 

## Educate Your Patients about Anesthesia

ASA offers a vast array of patient education resources you can distribute to your patients to educate them about anesthesia. Topics include:

- **Planning Your Childbirth:  
Pain Relief During Labor and Delivery**
- **Anesthesia & You...Patient Education Video**
- **Patient Awareness Under Anesthesia DVD**
- **Anesthesia for Ambulatory Surgery**
- **Plus much more ...**

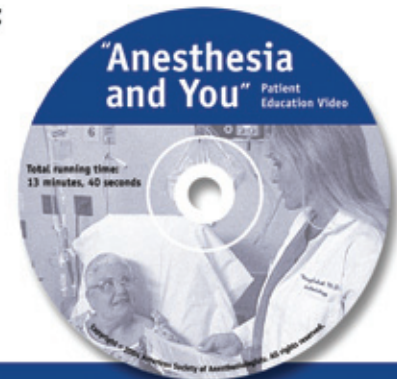

For more information and to order visit [www.asahq.org/Shop-ASA](http://www.asahq.org/Shop-ASA) or call 847-825-5586.
